# Supplementary material
Source: PubMed Central journal article supplement (PMC7540111)
Supplement: ajtr0012-5940-f7.pdf [file ajtr0012-5940-f7.pdf]

# Lnc-MALAT1/miR-125b/FOXQ1/PTGS2/CDK5 in Alzheimer's disease

**Table S1.** Correlation of candidate genes with CSF biomarkers in PD patients and Ctrl

| Items                    | Items        | Lnc-MALAT1 |        | MiR-125b |        | FOXQ1   |        | PTGS2   |        | CDK5    |        |
|--------------------------|--------------|------------|--------|----------|--------|---------|--------|---------|--------|---------|--------|
|                          |              | P value    | r      | P value  | r      | P value | r      | P value | r      | P value | r      |
| PD patients              |              |            |        |          |        |         |        |         |        |         |        |
| CSF samples (N = 50)     | MMSE         | 0.047      | 0.282  | 0.014    | -0.346 | 0.277   | 0.157  | 0.025   | -0.317 | 0.119   | -0.223 |
|                          | A $\beta$ 42 | 0.063      | 0.265  | 0.064    | -0.264 | 0.277   | 0.157  | 0.377   | -0.128 | 0.681   | -0.060 |
|                          | t-tau        | 0.092      | -0.241 | 0.016    | 0.338  | 0.358   | -0.133 | 0.016   | 0.339  | 0.187   | 0.190  |
|                          | p-tau        | 0.059      | -0.269 | 0.013    | 0.348  | 0.352   | -0.134 | 0.028   | 0.312  | 0.217   | 0.178  |
| Plasma samples (N = 120) | MMSE         | 0.578      | 0.051  | 0.056    | -0.175 | 0.254   | 0.105  | 0.138   | -0.136 | 0.128   | -0.140 |
|                          | A $\beta$ 42 | 0.587      | 0.050  | 0.297    | -0.096 | 0.995   | -0.001 | 0.140   | 0.135  | 0.046   | -0.183 |
|                          | t-tau        | 0.024      | -0.206 | 0.480    | 0.065  | 0.200   | -0.118 | 0.999   | 0.000  | 0.130   | 0.139  |
|                          | p-tau        | 0.058      | -0.174 | 0.713    | 0.034  | 0.174   | -0.125 | 0.949   | -0.006 | 0.432   | 0.070  |
| Ctrl                     |              |            |        |          |        |         |        |         |        |         |        |
| CSF samples (N = 50)     | MMSE         | 0.103      | 0.233  | 0.328    | -0.141 | 0.601   | 0.076  | 0.835   | 0.030  | 0.855   | 0.026  |
|                          | A $\beta$ 42 | 0.036      | 0.298  | 0.537    | -0.089 | 0.210   | 0.180  | 0.154   | -0.204 | 0.228   | -0.174 |
|                          | t-tau        | 0.113      | -0.227 | 0.009    | 0.366  | 0.001   | -0.455 | 0.058   | 0.270  | 0.174   | 0.195  |
|                          | p-tau        | 0.288      | -0.153 | 0.027    | 0.313  | 0.002   | -0.423 | 0.038   | 0.295  | 0.299   | 0.150  |
| Plasma samples (N = 120) | MMSE         | 0.470      | 0.067  | 0.638    | 0.043  | 0.721   | -0.033 | 0.462   | 0.068  | 0.853   | 0.017  |
|                          | A $\beta$ 42 | 0.042      | 0.186  | 0.239    | -0.108 | 0.600   | 0.048  | 0.660   | -0.048 | 0.714   | -0.034 |
|                          | t-tau        | 0.233      | -0.110 | 0.477    | 0.065  | 0.049   | -0.180 | 0.150   | 0.132  | 0.670   | 0.039  |
|                          | p-tau        | 0.189      | -0.121 | 0.946    | 0.006  | 0.127   | -0.140 | 0.061   | 0.171  | 0.887   | 0.013  |

Correlation was determined by Spearman's rank correlation test. CSF, cerebrospinal fluid; PD, Parkinson's disease; Ctrl, controls; Lnc-MALAT1, long noncoding RNA metastasis-associated lung adenocarcinoma transcript 1; miR-125b, microRNA 125b; FOXQ1, forkhead box Q1; PTGS2, prostaglandin-endoperoxide synthase 2; CDK5, cyclin dependent kinase 5; MMSE, mini-mental state examination; A $\beta$ 42, amyloid  $\beta$  42; t-tau, total tau; p-tau, phosphorylated tau.
